# Supplementary material for: Enhanced cytotoxicity of indenyl molybdenum(ii) compounds bearing a thiophene function
Source: Royal Society of Chemistry journal article supplement (doi:10.1039/c9dt01698h), 2019-01-01
Supplement: c9dt01698h1.pdf [file c9dt01698h1.pdf]

### Numbering scheme of the used ligands

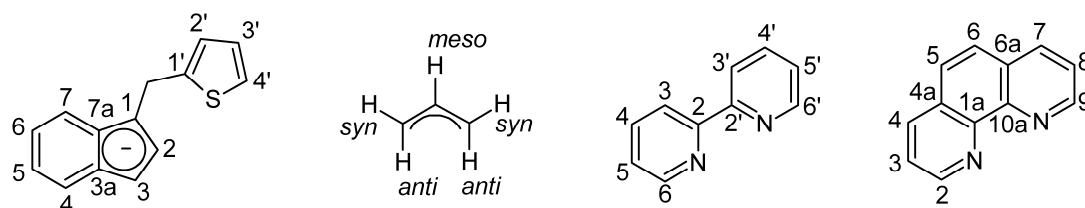

**Scheme S1**

**Table S1 Crystallographic data for complexes 2 and 4**

|                                                     | <b>2</b>                                           | <b>4</b>                                                                         |
|-----------------------------------------------------|----------------------------------------------------|----------------------------------------------------------------------------------|
| empiric formula                                     | C <sub>19</sub> H <sub>16</sub> MoO <sub>2</sub> S | C <sub>26</sub> H <sub>19</sub> MoN <sub>2</sub> O <sub>2</sub> SBF <sub>4</sub> |
| crystal system                                      | monoclinic                                         | monoclinic                                                                       |
| space group                                         | <i>P2<sub>1</sub>/n</i>                            | <i>P2<sub>1</sub>/n</i>                                                          |
| a[Å]                                                | 9.7184(7)                                          | 10.435(6)                                                                        |
| b[Å]                                                | 8.1432(6)                                          | 13.950(8)                                                                        |
| c[Å]                                                | 20.7926(14)                                        | 17.033(9)                                                                        |
| α[°]                                                | 90                                                 | 90                                                                               |
| β[°]                                                | 100.207(2)                                         | 98.418(16)                                                                       |
| γ[°]                                                | 90                                                 | 90                                                                               |
| Z                                                   | 4                                                  | 4                                                                                |
| μ[mm <sup>-1</sup> ]                                | 0.945                                              | 0.678                                                                            |
| D <sub>x</sub> [Mgm <sup>-3</sup> ]                 | 1.658                                              | 1.642                                                                            |
| cryst size [mm]                                     | 0.365×0.234×0.191                                  | 0.333×0.274×0.244                                                                |
| ϑ range [°]                                         | 2.5–27.5                                           | 1.9–27.5                                                                         |
| T <sub>min</sub> , T <sub>max</sub>                 | 0.78, 0.84                                         | 0.81, 0.85                                                                       |
| no. reflections measured                            | 33951                                              | 22750                                                                            |
| no. of unique reflns, R <sub>int</sub> <sup>a</sup> | 3734, 0.012                                        | 5656, 0.020                                                                      |
| no. of observed reflns [I>2σ(I)]                    | 3643                                               | 4804                                                                             |
| no. of parameters                                   | 229                                                | 362                                                                              |
| S <sup>b</sup> all data                             | 1.116                                              | 1.036                                                                            |
| final R <sup>b</sup> indices [I>2σ(I)]              | 0.020                                              | 0.020                                                                            |
| wR2 <sup>b</sup> indices (all data)                 | 0.022                                              | 0.087                                                                            |
| Δρ, max., min. [eÅ <sup>-3</sup> ]                  | 0.497, -0.763                                      | 0.669, -0.965                                                                    |
| no. CCDC                                            | 1853493                                            | 1853492                                                                          |

$$^a R_{\text{int}} = \frac{\sum |F_o^2 - F_{o,\text{mean}}^2|}{\sum F_o^2}, \quad ^b S = \left[ \frac{\sum (w(F_o^2 - F_c^2)^2)}{(N_{\text{diffrs}} - N_{\text{params}})} \right]^{1/2}, \quad ^b R(F) = \frac{\sum |F_o|}{\sum |F_c|}, \quad wR(F^2) = \left[ \frac{\sum (w(F_o^2 - F_c^2)^2)}{(\sum w(F_o^2)^2)} \right]^{1/2}$$

## Stability of complex 6

For the evaluation of the stability of the most active compound **6**, the complex was firstly dissolved in methanol and then diluted with water to obtain 1:1 (MeOH:H<sub>2</sub>O) solution. After that, the mass spectroscopy and UV/VIS were recorded. Subsequently, the solution was stirred at room temperature for 24 hours and the spectra were recorded again.

Electronic absorption spectra were run on a Black-Comet C-SR-100 concave grating spectrometer (region 200 - 1080 nm, optical pathway 1 and 0.1 cm). Mass spectrometry was performed with a quadrupole mass spectrometer (LCMS 2010, Shimadzu, Japan). The sample was injected into the mass spectrometer with infusion mode at a constant flow rate of 10  $\mu$ l/min. Electrospray ionization-mass spectrometry (ESI-MS) was used for the identification of analyzed samples. The experimental data are summarized in Table S2.

| <b>Table S2</b> UV/VIS data of complex <b>6</b> measured in 1:1 mixture MeOH:H <sub>2</sub> O. |                         |                                   |
|------------------------------------------------------------------------------------------------|-------------------------|-----------------------------------|
| Time (h)                                                                                       | $\lambda_{\max 1}$ [nm] | $\lambda_{\max 2}$ ( $\epsilon$ ) |
| 0                                                                                              | 287                     | 527                               |
| 24                                                                                             | 287                     | 525                               |

The UV/VIS spectrum of the compound **6** shows two main absorption bands at 287 and 527 nm with the extinction coefficients of 53966 and 8235 l mol<sup>-1</sup> cm<sup>-1</sup> respectively. After the stirring of the solution for 24 h the UV/VIS spectrum does show any signs of decomposition. The stability was also proved by MS spectra were the base peak with the m/z value of 697 corresponds to [M]<sup>+</sup> fragment.
